# Supplementary material for: Synthesis and biological evaluation of multivalent carbohydrate ligands obtained by click assembly of pseudo-rotaxanes
Source: Royal Society of Chemistry journal article supplement (doi:10.1039/b822976g), 2009-01-01

## Synthesis and Biological Evaluation of Multivalent Carbohydrate Ligands Obtained By Click Assembly of Pseudo-Rotaxanes †

Martin Chwalek, Rachel Auzély and Sébastien Fort\*

*Centre de Recherche sur les Macromolécules Végétales (CERMAV-CNRS), Affiliated with Université Joseph Fourier, and member of the Institut de Chimie Moléculaire de Grenoble, BP 53, 38041 Grenoble Cedex 9. Fax: +33 (0)4 76 54 72 0; Tel: +33 (0)4 76 03 76 62; E-mail: Sebastien.Fort@cermav.cnrs.fr*

**Supporting Information Available:** MS spectra and TLC profiles of rotaxane **13** and oligorotaxanes **14**, **15**, **16**. Figure displaying the diffusion coefficients of **13**, **14** and **16** calculated by NMR.

Diffusion coefficients of **13** (◆), **14** (■) and **16** (▲) calculated by NMR (500 MHz, 298K, D<sub>2</sub>O) from proton signals of the cyclodextrin and the lactosyl group ( $\delta=3.4-4$  ppm), of the triazole group ( $\delta=7.3-8$  ppm) and of the decane chain ( $\delta=0.9-1.6$  ppm).

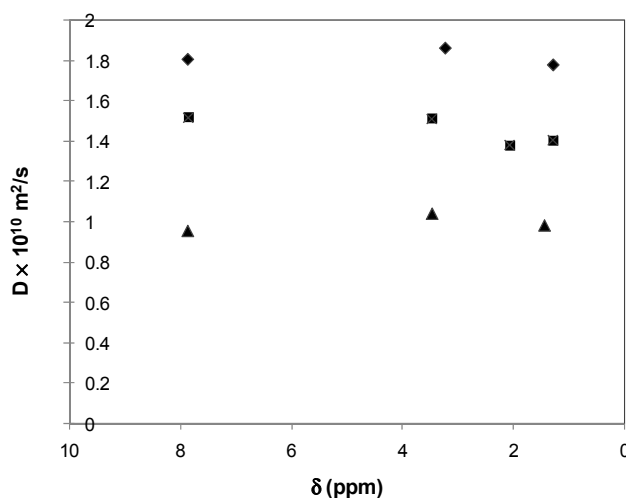

TLC profiles of 1) Lactosyl-cyclodextrin **6**, 2) Rotaxane **13**, 3) Oligorotaxane **14**, 4) Oligorotaxane **15**, 5) Oligorotaxane **16**. Elution conditions: CH<sub>3</sub>CN/H<sub>2</sub>O (2% NaBr) 6:4.

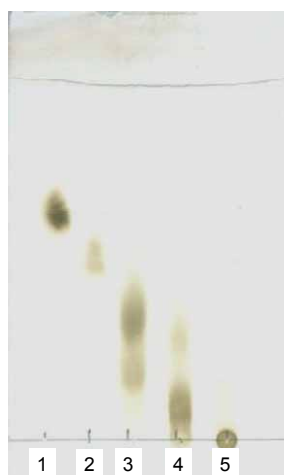

MALDI-MS spectrum of rotaxane **13**. The peak at 2508 was assigned to **13**

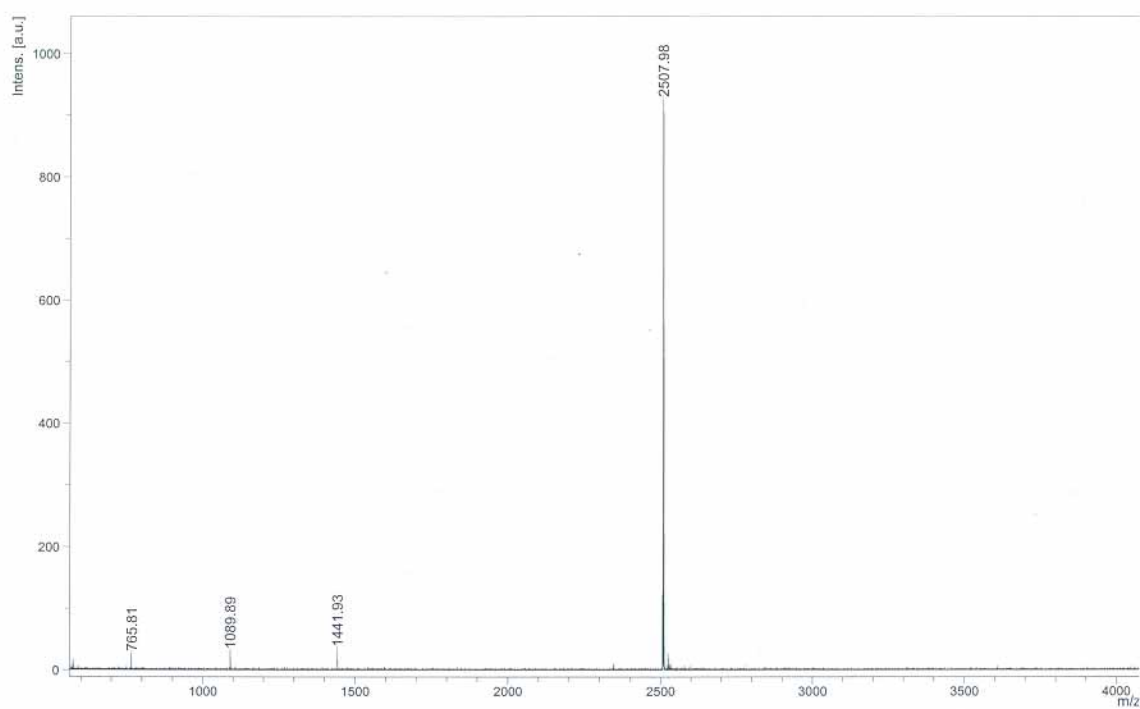

MALDI-MS spectrum of oligorotaxane **14**. Peaks at 2871, 4305 and 5723 were assigned to oligorotaxanes with 1, 2 and 3 threaded cyclodextrins respectively.

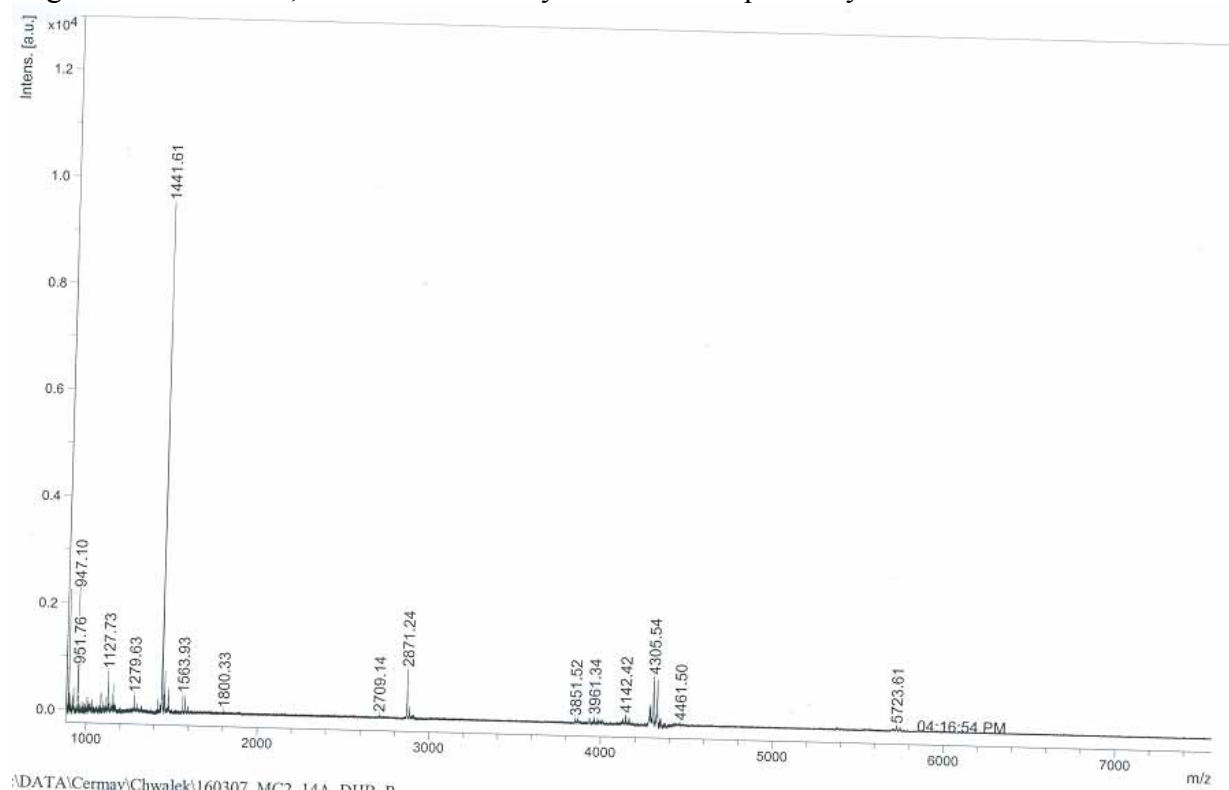

MALDI-MS spectrum of oligorotaxane **15**. Peaks at 4403, 5864 and 7243 were assigned to oligorotaxanes with 2, 3 and 4 threaded cyclodextrins respectively.

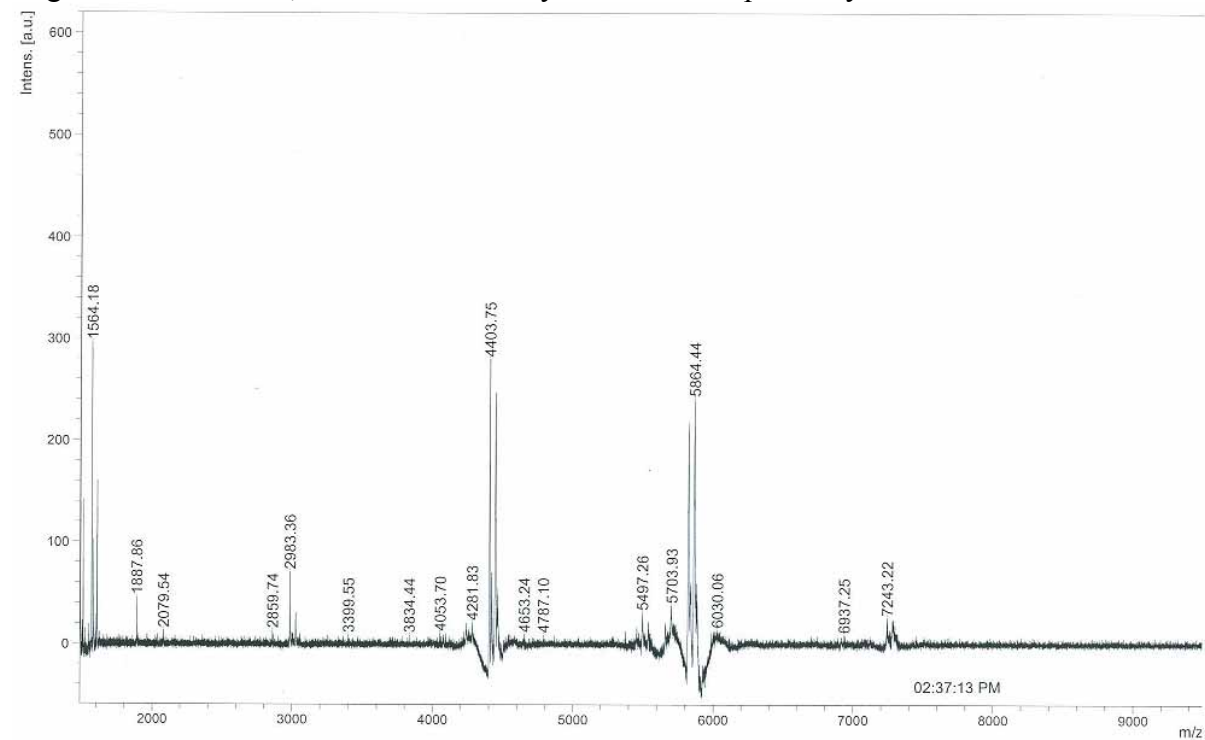

MALDI-MS spectrum of oligorotaxane **16**. Peaks at 5819, 7237, 8653 and 10072 were assigned to oligorotaxanes with 3, 4, 5 and 6 threaded cyclodextrins respectively.

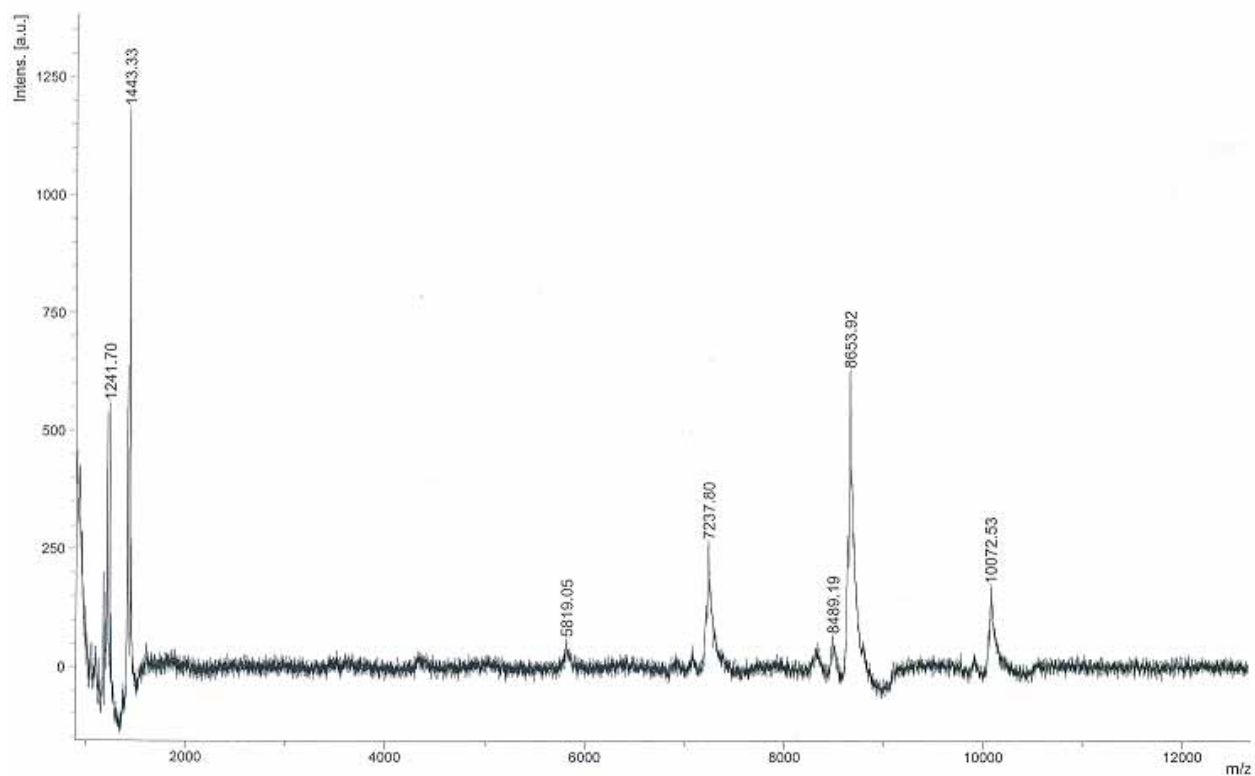

Supplement: b822976g.pdf [file b822976g.pdf]
